# Supplementary material for: The electronic transport properties of zigzag phosphorene-like MX (M = Ge/Sn, X = S/Se) nanostructures
Source: Royal Society of Chemistry journal article supplement (doi:10.1039/c7cp02201h), 2017-01-01
Supplement: c7cp02201h1.pdf [file c7cp02201h1.pdf]

## Supplementary Information for

### **The electronic transport properties of zigzag phosphorene-like MX (M=Ge/Sn, X=S/Se) nanostructures**

Mengjun Zhang,<sup>a</sup> Yipeng An,<sup>\*a</sup> Yongqiang Sun,<sup>a</sup> Dapeng Wu,<sup>b</sup> Xuenian Chen,<sup>b</sup> Tianxing Wang,<sup>a</sup> Guoliang Xu,<sup>a</sup> and Kun Wang<sup>c</sup>

*<sup>a</sup>College of Physics and Materials Science & Henan Key Laboratory of Boron Chemistry and Advanced Energy Materials, Henan Normal University, Xinxiang 453007, China.*

*Correspondence to [ypan@htu.edu.cn](mailto:ypan@htu.edu.cn).*

*<sup>b</sup>School of Chemistry and Chemical Engineering & Henan Key Laboratory of Boron Chemistry and Advanced Energy Materials, Henan Normal University, Xinxiang 453007, China*

*<sup>c</sup>Department of Mechanical Engineering, University of Michigan, Ann Arbor, Michigan 48109, USA*

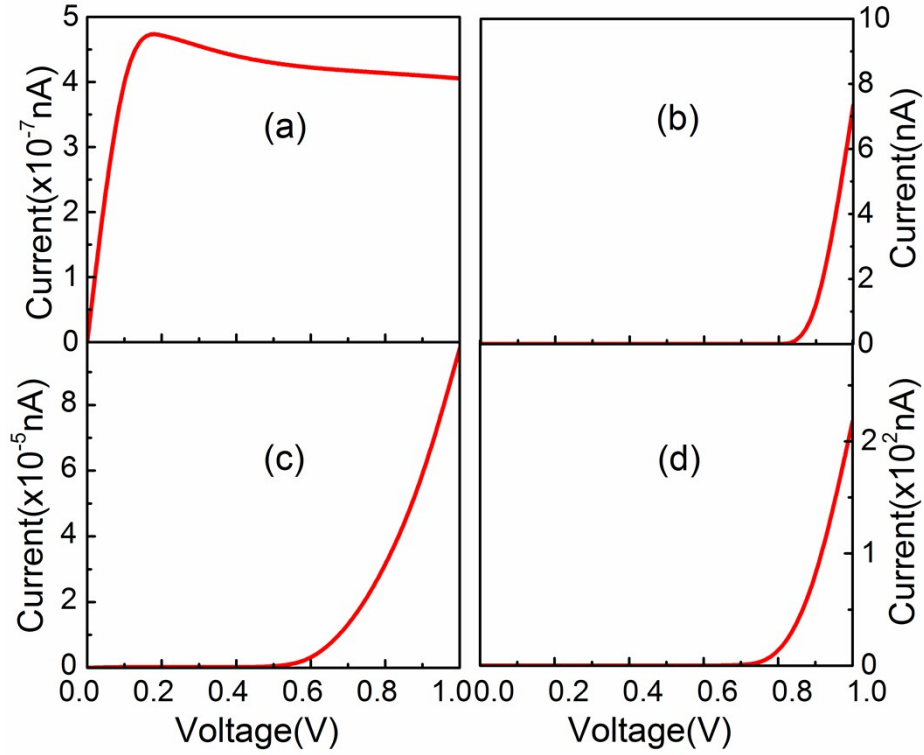

**Fig. S1** The *I-V* curves of (a) GeS, (b) GeSe, (c) SnS, and (d) SnSe monolayers.

The 2D monolayers could present completely different electronic and transport properties from their 1D nanoribbons. Concretely, the conductance of GeSe/SnSe monolayer is larger than that of GeS/SnS, and the conductance of SnS/SnSe is larger than that of GeS/GeSe monolayer.
